# Supplementary material for: Altered sucrose synthase and invertase expression affects the local and systemic sugar metabolism of nematode-infected Arabidopsis thaliana plants
Source: PubMed Central journal article supplement (PMC3883288; doi:10.1093/jxb/ert359), 2013-11-01
Supplement: supp_ert359_jexbot106039_file001.pdf [file supp_ert359_jexbot106039_file001.pdf]

**Altered sucrose synthase and invertase expression affects the local and systemic sugar metabolism of nematode-infected *Arabidopsis thaliana* plants**

Susana Cabello<sup>1</sup>, Cindy Lorenz<sup>2</sup>, Sara Crespo<sup>1</sup>, Javier Cabrera<sup>3</sup>, Roland Ludwig<sup>2</sup>, Carolina Escobar<sup>3</sup> & Julia Hofmann<sup>1\*</sup>

**Figure S1.** Fold change ( $\log_2$ ) expression levels of *SUS* and *CINV* genes in *H. schachtii*-induced syncytia compared to non-infected *A. thaliana* wild type roots. Values are means  $\pm$ SE, n=3 (left side). Total and female nematode infection rates, female size and eggs per cyst of *H. schachtii* on single *A. thaliana sus* and *cinv* T-DNA mutant lines relative to the wild type. Values are means  $\pm$ SE, n=14 to 33 (right side). \* indicate significant differences (Student's t-test,  $p \leq 0.05$ ).

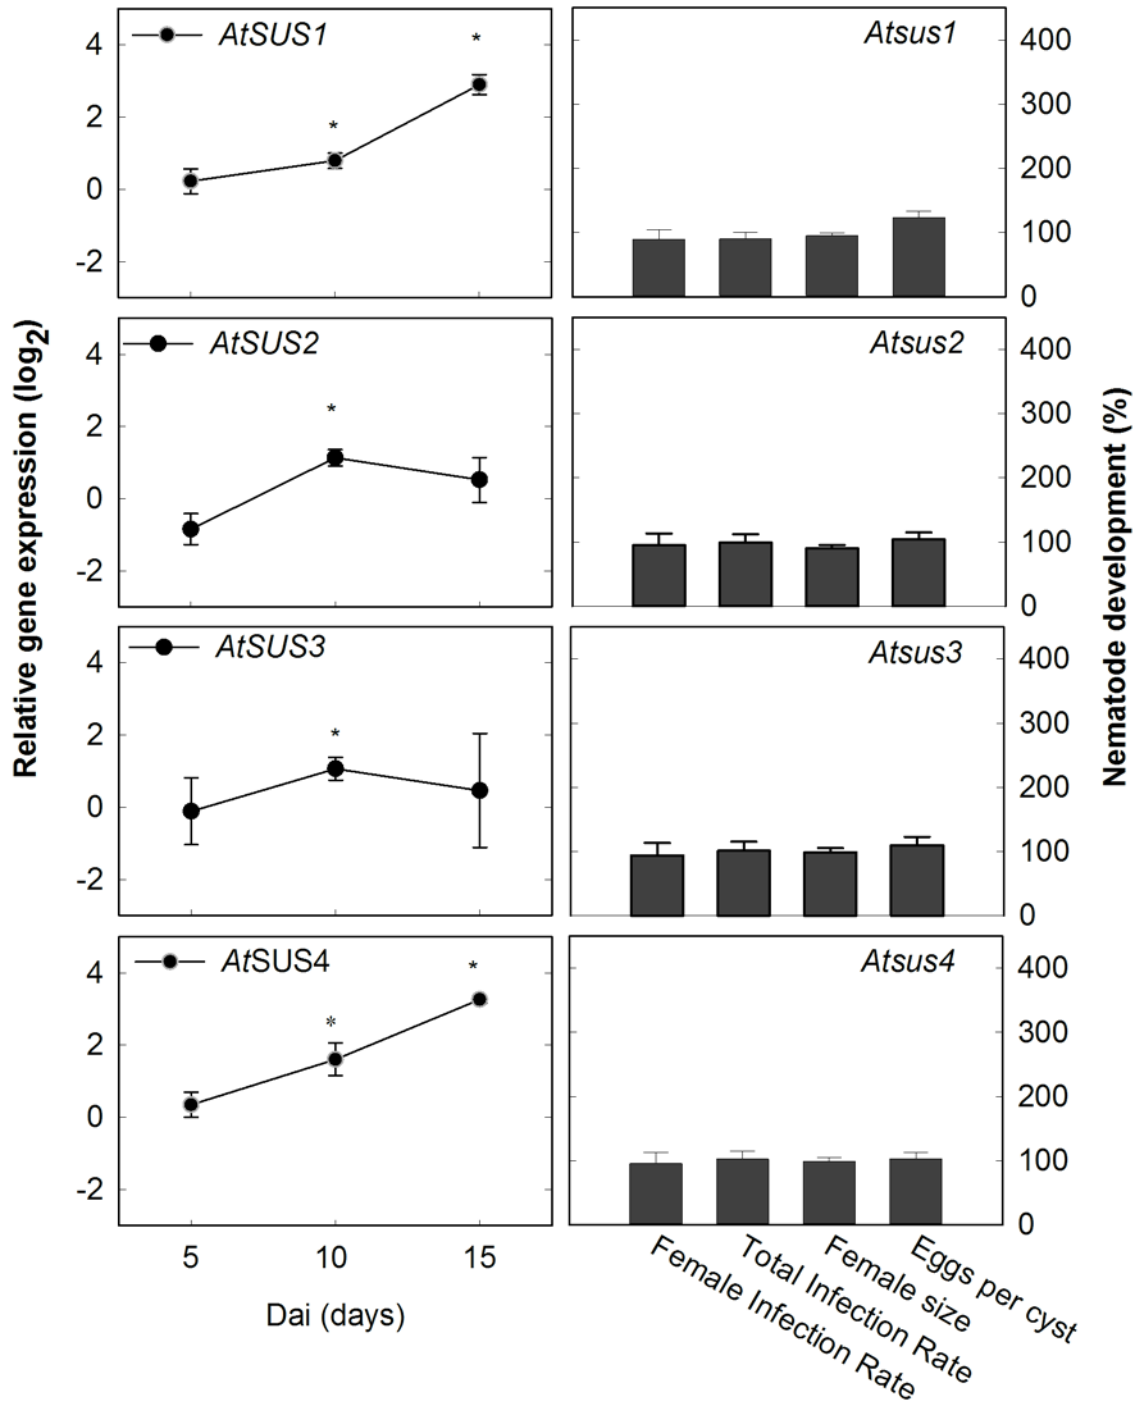

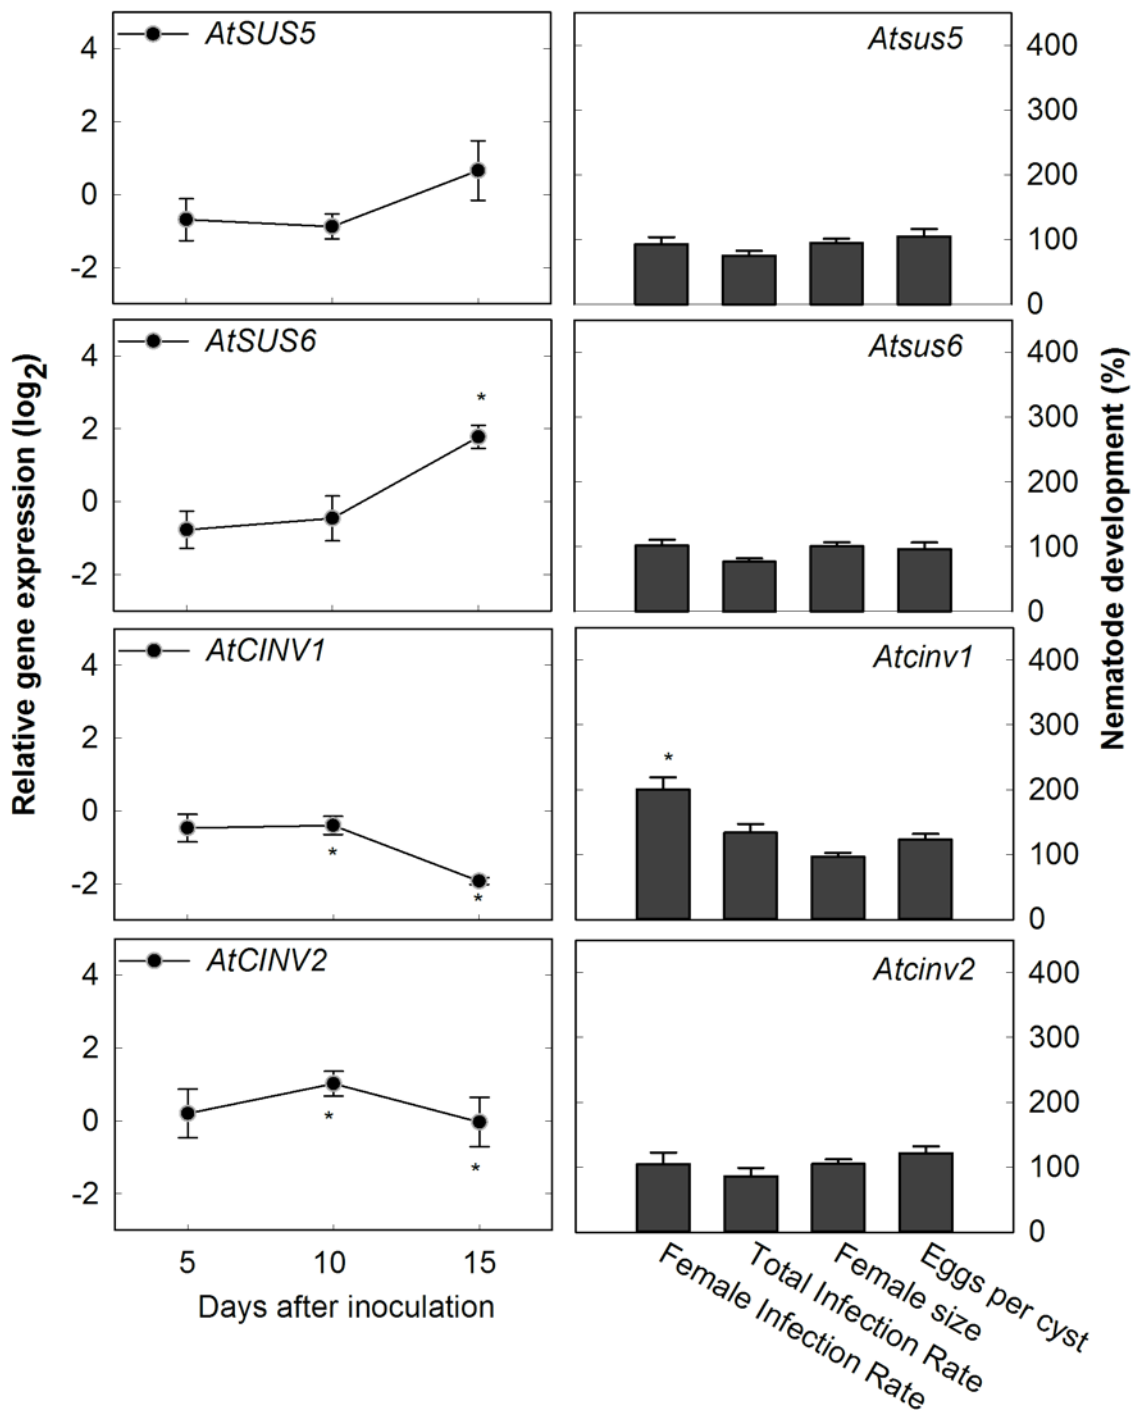

**Altered sucrose synthase and invertase expression affects the local and systemic sugar metabolism of nematode-infected *Arabidopsis thaliana* plants**

Susana Cabello<sup>1</sup>, Cindy Lorenz<sup>2</sup>, Sara Crespo<sup>1</sup>, Javier Cabrera<sup>3</sup>, Roland Ludwig<sup>2</sup>, Carolina Escobar<sup>3</sup> & Julia Hofmann<sup>1\*</sup>

**Figure S2.** Fold change ( $\log_2$ ) expression levels of *SUS* genes in *H. schachtii*-induced syncytia of the *Atcinv1/Atcinv2* line compared to the wild type. Values are means  $\pm$ SE, n=3.

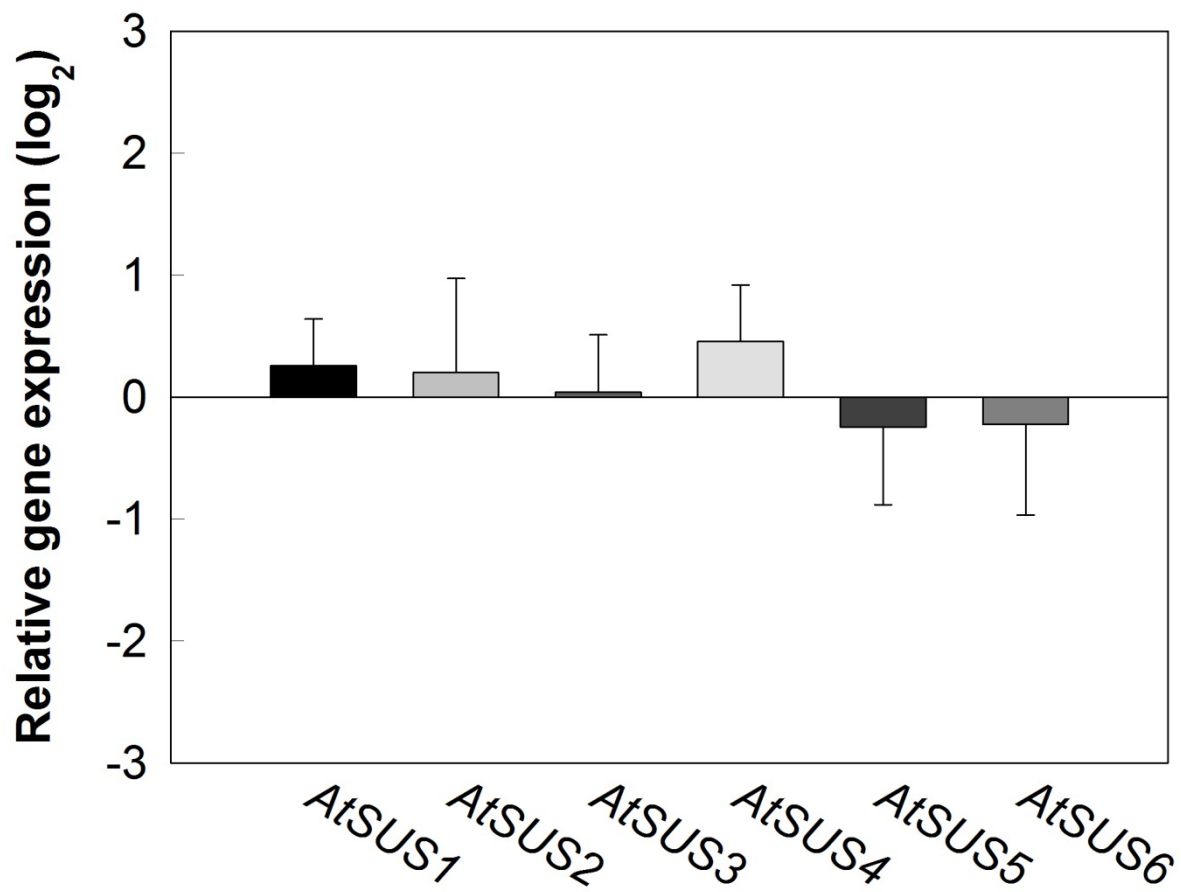

**Altered sucrose synthase and invertase expression affects the local and systemic sugar metabolism of nematode-infected *Arabidopsis thaliana* plants**

Susana Cabello<sup>1</sup>, Cindy Lorenz<sup>2</sup>, Sara Crespo<sup>1</sup>, Javier Cabrera<sup>3</sup>, Roland Ludwig<sup>2</sup>, Carolina Escobar<sup>3</sup> & Julia Hofmann<sup>1\*</sup>

**Figure S3.** Sugar levels of shoots of nematode-infected wild type, *cinv1/cinv2* and *sus1/sus4* T-DNA insertion lines (15 dai). Values are means  $\pm$ SE, n=3, no significant differences from the wild type were observed (Student's t-test,  $p \leq 0.05$ ).

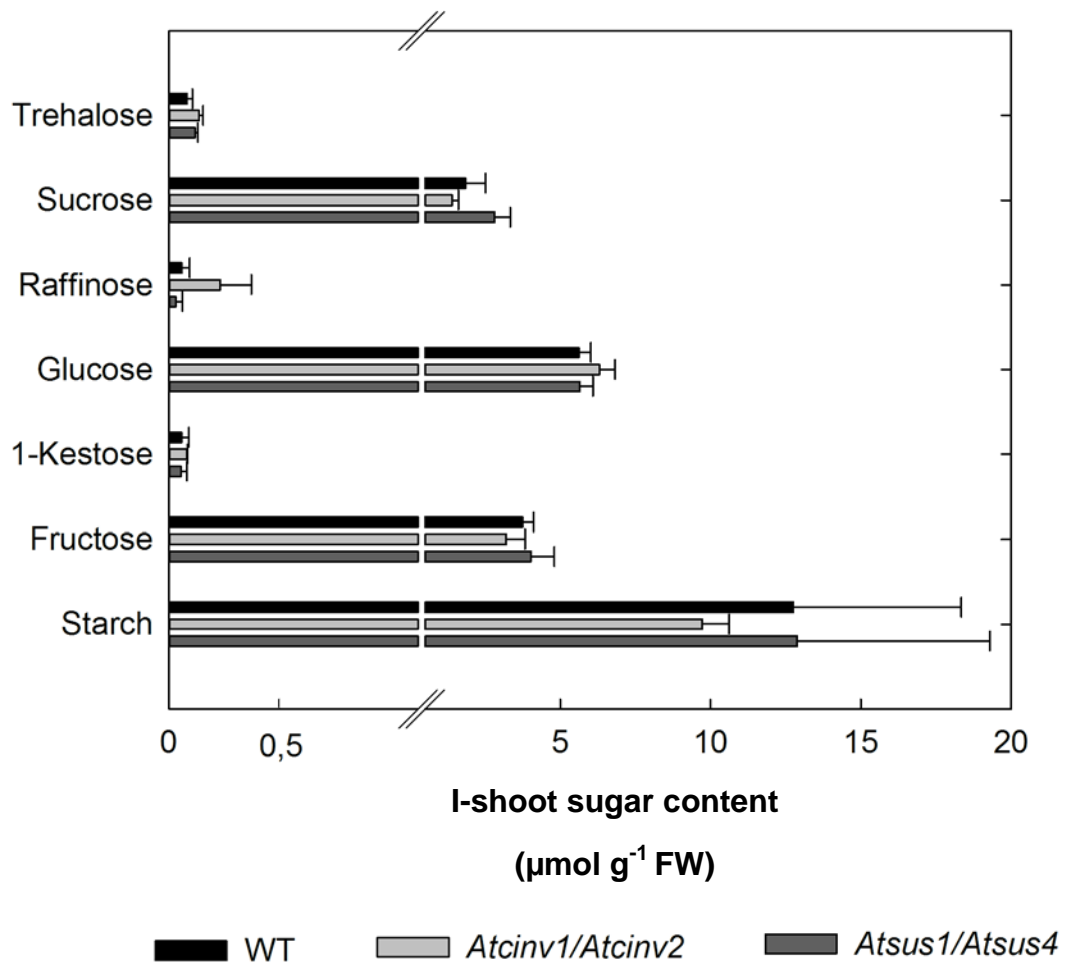

**Altered sucrose synthase and invertase expression affects the local and systemic sugar metabolism of nematode-infected *Arabidopsis thaliana* plants**

Susana Cabello<sup>1</sup>, Cindy Lorenz<sup>2</sup>, Sara Crespo<sup>1</sup>, Javier Cabrera<sup>3</sup>, Roland Ludwig<sup>2</sup>, Carolina Escobar<sup>3</sup> & Julia Hofmann<sup>1\*</sup>

**Table S1:** List of T-DNA insertion lines used in this study and their sources. All lines have the *Arabidopsis* Col0 background.

| <b>Name</b>            | <b>Locus</b> | <b>Salk line</b> | <b>Source</b>           |
|------------------------|--------------|------------------|-------------------------|
| <i>Atsus1</i>          | At5g20830    | SALK-014303      | NASC                    |
| <i>Atsus2</i>          | At5g49190    | SALK-076303      | NASC                    |
| <i>Atsus3</i>          | At4g02280    | SALK-019405      | NASC                    |
| <i>Atsus4</i>          | At3g43190    | Arab4            | Bieniawska et al., 2007 |
| <i>Atsus5</i>          | At1g73370    | SAIL-374-D07     | NASC                    |
| <i>Atcinv1</i>         | At1g35580    | Salk_095807      | NASC                    |
| <i>Atcinv2</i>         | At4g09510    | Sail_518_d02     | NASC                    |
| <i>Atsus3/Atsus2</i>   | At4g02280    | Salk_019405      | Bieniawska et al., 2007 |
|                        | At5g49190    | Salk_076303      |                         |
| <i>Atsus5/Atsus6</i>   | At5g37180    | Salk_152944      | Bieniawska et al., 2007 |
|                        | At1g73370    | Salk_107491      |                         |
| <i>Atsus1/Atsus4</i>   | At4g20830    | Salk_014303      | Bieniawska et al., 2007 |
|                        | At3g43190    | Arab4            |                         |
| <i>Atcinv1/Atcinv2</i> | At1g35580    | Salk_095807      | Barratt et al., 2009    |
|                        | At4g09510    | Sail_518_d02     |                         |

**Altered sucrose synthase and invertase expression affects the local and systemic sugar metabolism of nematode-infected *Arabidopsis thaliana* plants**

Susana Cabello<sup>1</sup>, Cindy Lorenz<sup>2</sup>, Sara Crespo<sup>1</sup>, Javier Cabrera<sup>3</sup>, Roland Ludwig<sup>2</sup>, Carolina Escobar<sup>3</sup> & Julia Hofmann<sup>1\*</sup>

**Table S2.** Primer sequence used to identified the correct T-DNA insertion in *SUS* and *CINV* genes

| <b>Gene</b> | <b>Primer sequence</b>                                 |
|-------------|--------------------------------------------------------|
| At1g35580   | RP CAATCGACCAAATGAGTGAGG<br>LP CGCTAGACCTAGCCATTAGGG   |
| At4g09510   | RP AACGATCTCTTCCGTTTCGATC<br>LP GAGCCACATAATTCAAAGCAAC |
| At5g20830   | RP CGCTTGTTTCTGAGAGAAACG<br>LP TCCCCTCTCAAGACCAATCTC   |
| At5g49190   | RP TGCACCATTTCTGAAACCTT<br>LP CATGGGTAATGGTTTTGGTTG    |
| At4g02280   | RP TTTCCCGTATTCCGAAGAAAC<br>LP TTGGAGACCAGCGTCTGATAC   |
| At5g37180   | RP TTGTTTGGCCAGTTTCTGATC<br>LP ATTTCCCTTTTACCGCACAAG   |
| At1g73370   | RP ATCCATCTGAATTTCCCCTTG<br>LP TGACACGGTTAATACCGGAAG   |

**Altered sucrose synthase and invertase expression affects the local and systemic sugar metabolism of nematode-infected *Arabidopsis thaliana* plants**

Susana Cabello<sup>1</sup>, Cindy Lorenz<sup>2</sup>, Sara Crespo<sup>1</sup>, Javier Cabrera<sup>3</sup>, Roland Ludwig<sup>2</sup>, Carolina Escobar<sup>3</sup> & Julia Hofmann<sup>1\*</sup>

**Table S3.** Primers sequences, concentrations and MgCl<sub>2</sub> concentrations for q-PCR

| Gene      | Primer           | sequence | Primer (nM)             | MgCl <sub>2</sub> (nM) |    |
|-----------|------------------|----------|-------------------------|------------------------|----|
| At1g35580 | <i>AtCINV1</i>   | FP       | TCGAGGGCCATGAGTGGCGC    | 300                    |    |
|           |                  | RP       | CGCGGTCTTGGCAGTCTGCG    |                        |    |
| At4g09510 | <i>AtCINV2</i>   | FP       | CGGTGGATCTTGGCCAGTATTGC | 200                    |    |
|           |                  | RP       | CCAGCAATCTCGGTGTAGCCGT  |                        |    |
| At3g13790 | <i>AtCWINV1</i>  | FP       | GCCAGCTCGTTCCGTGACCC    | 200                    |    |
|           |                  | RP       | ACGAAGACGTTTCCACGCCGTT  |                        |    |
| At3g52600 | <i>AtCWINV2</i>  | FP       | CGTGAAGGGTTGGGCCGGAA    | 200                    |    |
|           |                  | RP       | GGACCTCAAAGCGTTGGCCC    |                        |    |
| At1g55120 | <i>AtCWINV3</i>  | FP       | ATCTCAACCAACCGTACCGGACC | 200                    |    |
|           |                  | RP       | CGTGGAGTGTCCCCACACGA    |                        |    |
| At2g36190 | <i>AtCWINV4</i>  | FP       | ACCAAAGGTGCGGTTTGGGGT   | 200                    |    |
|           |                  | RP       | TGAACCGGACCATGTACCTCCG  |                        |    |
| At3g13784 | <i>AtCWINV5</i>  | FP       | GGTTGGGCCGGTTTACAGGCT   | 150                    |    |
|           |                  | RP       | GGATCGGTCCAGCCCGGTTT    |                        |    |
| At5g11920 | <i>AtCWINV6</i>  | FP       | GCATCACTGCTGCCCAAGCA    | 200                    | 25 |
|           |                  | RP       | TGCATATCCGTTACCGCGACGA  |                        |    |
| At1g62660 | <i>AtVACINV1</i> | FP       | GGCGAGCACGGAAGCTCTCT    | 200                    |    |
|           |                  | RP       | TCAGCCTTGGAGCCGTCGTG    |                        |    |
| At1g12240 | <i>AtVACINV2</i> | FP       | GTGGACCGGCTCAGCCACAT    | 200                    |    |
|           |                  | RP       | AGGGAGGATACCGGGCGGAG    |                        |    |
| At5g20830 | <i>AtSUS1</i>    | FP       | GCGCGTCCACAGCCAACGTG    | 200                    |    |
|           |                  | RP       | ACCAGGCCTTGGCCTCACAGC   |                        |    |
| At5g49190 | <i>AtSUS2</i>    | FP       | AGGGTGTACCAAATCTCAT     | 300                    | 25 |
|           |                  | RP       | CATAGTCAAAGCTGTGTGG     |                        |    |
| At4g02280 | <i>AtSUS3</i>    | FP       | GAGCACGGGCTCTCGGGTTT    | 200                    |    |
|           |                  | RP       | GCCGAGTCTCACGACGCTCC    |                        |    |
| At3g43190 | <i>AtSUS4</i>    | FP       | CACACTTCCCGGGTTGTACCGT  | 350                    | 25 |
|           |                  | RP       | GCGCAAGCGAGTGTCTTACCG   |                        |    |
| At5g37180 | <i>AtSUS5</i>    | FP       | GTCCTCGAAGCTCGGAGGGC    | 180                    |    |
|           |                  | RP       | CTCCCTGCGCTTTCTCCCA     |                        |    |
| At1g73370 | <i>AtSUS6</i>    | FP       | CGCCTTGATTGCAAGCCAGACC  | 200                    |    |
|           |                  | RP       | TGGCCTGTCCTTGCTTCCTGC   |                        |    |



---

|           |                |    |                         |     |    |
|-----------|----------------|----|-------------------------|-----|----|
| At5g10790 | <i>UBP22</i>   | FP | ACAACATATGACCCGTTTATCGA | 347 | 30 |
|           |                | RP | TGTTTAGGCGGAACGGATACT   |     |    |
|           | <i>18SrRNA</i> | FP | GGTGGTAACGGGTGACGGAGAAT | 355 | 30 |
|           |                | RP | CGCCGACCGAAGGGACAAGCCGA |     |    |

---
